# Supplementary material for: Hydrogen bonded dimers of ketocoumarin in the solid state and alcohol:water binary solvent: fluorescence spectroscopy, crystal structure and DFT investigation
Source: Royal Society of Chemistry journal article supplement (doi:10.1039/c9nj01053j), 2019-01-01
Supplement: c9nj01053j1.pdf [file c9nj01053j1.pdf]

## Supporting Information

### **Hydrogen bonded dimers of ketocoumarin in solid state and alcohol: water binary solvent by fluorescence spectroscopy, crystal structure and DFT investigation.**

Kannan Ramamurthy, E. J. Padma Malar\*, Chellappan Selvaraju\*

**National Centre for Ultrafast Processes, University of Madras, Chennai 600 113, Tamil Nadu, India.**

\*Corresponding author E-mail addresses: [selvaraj24@hotmail.com](mailto:selvaraj24@hotmail.com)

### **Contents**

Preparation of KC

**Figure S1**  $^1\text{H}$  NMR (400 MHz) spectrum of KC in  $\text{CDCl}_3$ -DMSO- $d_6$ .

**Figure S2**  $^{13}\text{C}$  NMR (100 MHz) spectrum of KC in  $\text{CDCl}_3$ -DMSO- $d_6$ .

**Figure S3** Absorption (a) and Emission (b) Spectra of KC in different percentage of ethanol and ethanol: water mixture.

**Table S-1** The absorption and emission properties of KC in ethanol: water binary mixture.

**Figure S4** Absorption (a) and Emission (b) Spectra of KC in n-ProH and n-ProH: water mixture.

**Table S-2** The absorption and emission properties of KC in n-ProH: water binary mixture.

**Figure S5** Fluorescence decay of KC in THF:water mixture

**Table S-3** The fluorescence lifetime data of KC in THF: water mixture

**Table S-4** Crystal data and structure refinement for KC.

**Figure S6** Hirshfeld surface 2D-fingerprint plots for the various intermolecular interaction in KC.

**Figure S7** Two views of the Hirshfeld surface mapped over  $d_{\text{norm}}$ .

**Table S-5** Total energies (hartree), (relative energies in kcal/mol) in the DFT optimized structures I,II, III of KC.

**Table S-6** Bond lengths (in Å) of bridge carbonyl C10=O5 and the adjacent C8-C10 bonds predicted by the DFT methods and the XRD study.

### Preparation of KC

4-Diethylaminosalicylaldehyde (0.966g, 5.0 mmol) and dimethyl 1,3-acetonedicarboxylate (0.435g, 2.5 mmol) were dissolved in warm ethanol (25mL). Piperidine 1.25 mL was added, and the mixture was refluxed for 2 hours. The mixture was cooled to room temperature; the product was collected by filtration, washed with ethanol and recrystallized from ethanol. KC was obtained as a red solid with 70% yield (1.15 g). M. p 185.0–192.0 °C. <sup>1</sup>H NMR (400 MHz, CDCl<sub>3</sub>): δ 8.16 (s,2H), 7.38 (7.38 (d, J=8Hz),6.61 (d, 2H J=8Hz), 6.49 (s,2H), 3.47 (m,8H,J=8Hz),1.25 (t,12H,J=8Hz) ppm; <sup>13</sup>C NMR (100 MHz, CDCl<sub>3</sub>) δ 188. 620, 160. 399, 158. 183, 152. 323, 145.761, 131. 09, 120. 382, 109.409, 108. 466, 97. 214, 45. 050, 12.48 ppm.

### NMR spectrum

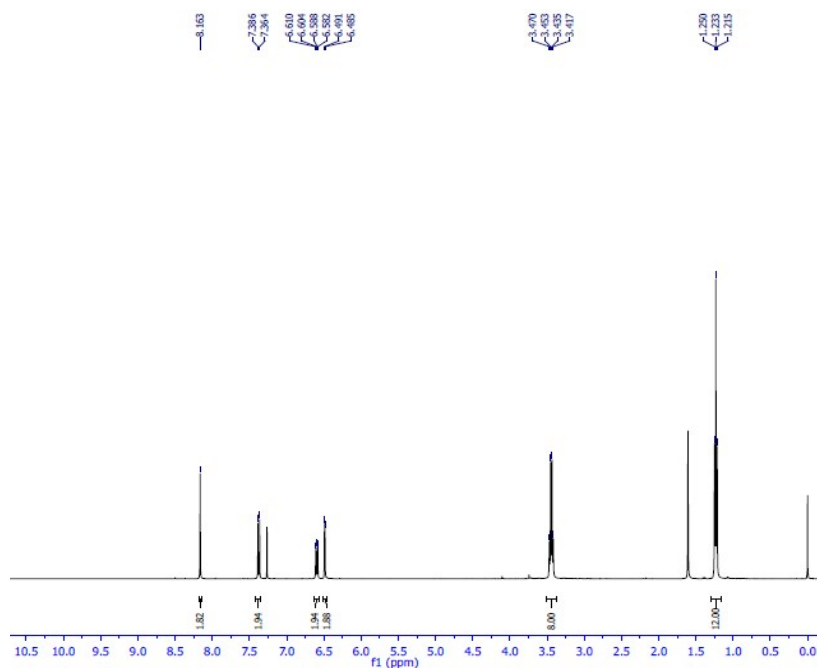

**Fig. S1** <sup>1</sup>H NMR (400 MHz) spectrum of KC in CDCl<sub>3</sub>-DMSO-d<sub>6</sub>.

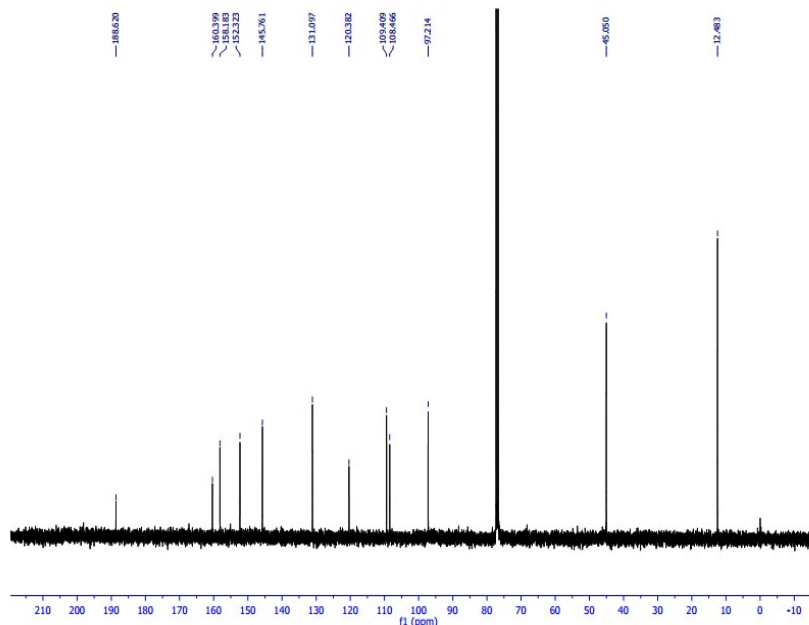

Fig. S2  $^{13}\text{C}$  NMR (100 MHz) spectrum of KC in  $\text{CDCl}_3$ - $\text{DMSO-d}_6$

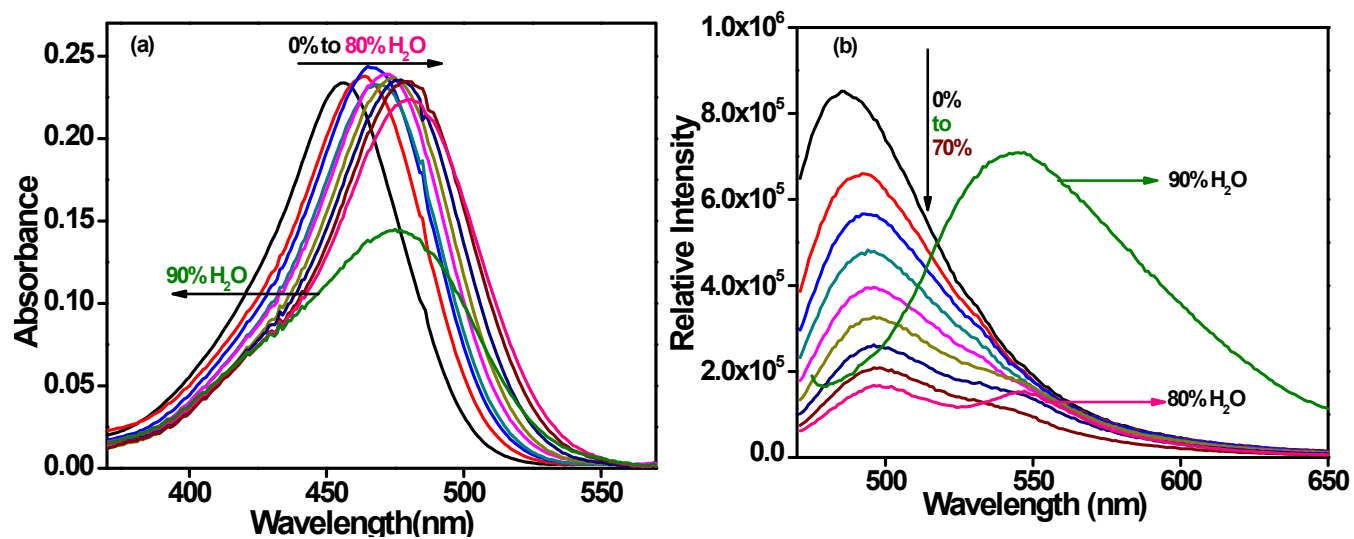

Fig. S3 Absorption (a) and Emission (b) spectra of KC in ethanol and ethanol: water mixtures.  $\lambda_{\text{exc}}$  460 nm. The concentration of KC is  $2.5388 \times 10^{-6}\text{M}$ .

**Table S1** The absorption and emission properties of KC in Ethanol: water binary mixture.

| % H <sub>2</sub> O | Absorption $\lambda_{\text{max}}$ (nm) | Emission $\lambda_{\text{max}}$ (nm) | Stokes shift $\Delta\nu$ (cm <sup>-1</sup> ) |
|--------------------|----------------------------------------|--------------------------------------|----------------------------------------------|
| 0                  | 456                                    | 487                                  | 1395                                         |
| 10                 | 466                                    | 494                                  | 1216                                         |
| 20                 | 467                                    | 494                                  | 1170                                         |
| 30                 | 469                                    | 495                                  | 1120                                         |
| 40                 | 473                                    | 497                                  | 1020                                         |
| 50                 | 474                                    | 496                                  | 935                                          |
| 60                 | 478                                    | 496                                  | 758                                          |
| 70                 | 481                                    | 497                                  | 669                                          |
| 80                 | 482                                    | 544                                  | 2364                                         |
| 90                 | 475                                    | 544                                  | 2670                                         |

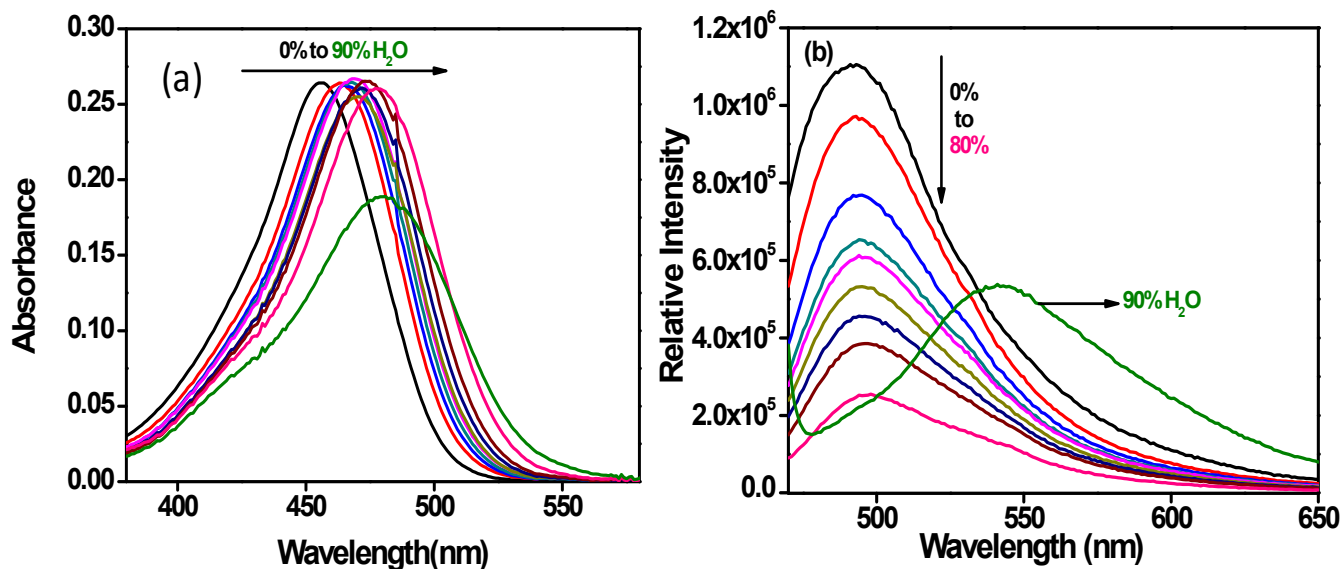

**Fig. S4** Absorption (a) and Emission (b) Spectra of KC in n-proH and n-proH: water mixtures.  $\lambda_{exc}$  460 nm. The concentration of KC is  $2.7849 \times 10^{-6} M$ .

**Table S2.** The absorption and emission properties of KC in n-proH: water binary mixture.

| % H <sub>2</sub> O | Absorption $\lambda_{max}$ (nm) | Emission $\lambda_{max}$ (nm) | Stokes shift $\Delta\nu$ (cm <sup>-1</sup> ) |
|--------------------|---------------------------------|-------------------------------|----------------------------------------------|
| 0                  | 455                             | 493                           | 1694                                         |
| 10                 | 463                             | 493                           | 1314                                         |
| 20                 | 465                             | 495                           | 1303                                         |
| 30                 | 468                             | 494                           | 1124                                         |
| 40                 | 468                             | 496                           | 1206                                         |
| 50                 | 471                             | 495                           | 1010                                         |
| 60                 | 472                             | 497                           | 935                                          |
| 70                 | 473                             | 497                           | 669                                          |
| 80                 | 474                             | 545                           | 2748                                         |
| 90                 | 475                             | 545                           | 2734                                         |

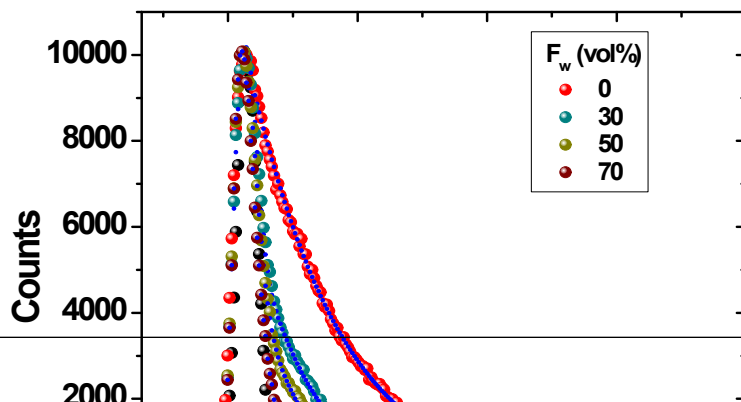

**Fig. S5** Fluorescence decay of KC in THF:water mixture. Excitation wavelength is 445 nm.

**Table S3** The fluorescence lifetime data of KC in THF: water mixture

| 0%<br>H <sub>2</sub> O | $\tau_1^a$ (ns) | $\tau_2^a$ (ns) | B <sub>1</sub> (%) | B <sub>2</sub> (%) | $\chi^2$ |
|------------------------|-----------------|-----------------|--------------------|--------------------|----------|
| 0                      | 2.01            | -               | 100                | -                  | 1.299    |
| 30                     | 0.156           | 1.36            | 30.06              | 69.94              | 1.252    |
| 50                     | 0.160           | 1.12            | 35.37              | 64.63              | 1.299    |
| 70                     | 0.140           | 0.60            | 38.93              | 61.07              | 1.260    |

<sup>a</sup> Error in the lifetime  $\pm 10\%$ .

**Table S4** Crystal data and structure refinement for KC

|                                   |                                                                                                           |
|-----------------------------------|-----------------------------------------------------------------------------------------------------------|
| <b>Empirical formula</b>          | <b>C<sub>28</sub> H<sub>29</sub> Cl<sub>3</sub> N<sub>2</sub> O<sub>5</sub></b>                           |
| CCDC                              | 1819005                                                                                                   |
| Formula weight                    | 579.88                                                                                                    |
| Temperature                       | 296(2) K                                                                                                  |
| Wavelength                        | 0.71073 Å                                                                                                 |
| Crystal system                    | Orthorhombic                                                                                              |
| Space group                       | Pbca                                                                                                      |
| Unit cell dimensions              | <b>a = 11.7204(5) Å</b> a = 90°.<br><b>b = 17.1714(8) Å</b> b = 90°.<br><b>c = 28.6443(14) Å</b> c = 90°. |
| Volume                            | 5764.8(5) Å <sup>3</sup>                                                                                  |
| Z                                 | 8                                                                                                         |
| Density (calculated)              | 1.336 Mg/m <sup>3</sup>                                                                                   |
| Absorption coefficient            | 0.357 mm <sup>-1</sup>                                                                                    |
| F(000)                            | 2416                                                                                                      |
| Crystal size                      | 0.300 x 0.250 x 0.200 mm <sup>3</sup>                                                                     |
| Theta range for data collection   | 3.026 to 25.000°.                                                                                         |
| Index ranges                      | 13 ≤ h ≤ 13, -20 ≤ k ≤ 20, -                                                                              |
| 34 ≤ l ≤ 34                       |                                                                                                           |
| Reflections collected             | 76035                                                                                                     |
| Independent reflections           | 5044 [R(int) = 0.0257]                                                                                    |
| Completeness to theta = 25.000°   | 99.4 %                                                                                                    |
| Absorption correction             | Semi-empirical from equivalents                                                                           |
| Max. and min. transmission        | 0.7459 and 0.7033                                                                                         |
| Refinement method                 | Full-matrix least-squares on F <sup>2</sup>                                                               |
| Data / restraints / parameters    | 5044 / 69 / 371                                                                                           |
| Goodness-of-fit on F <sup>2</sup> | 1.080                                                                                                     |
| Final R indices [I > 2σ(I)]       | R1 = 0.0506, wR2 = 0.1383                                                                                 |
| R indices (all data)              | R1 = 0.0596, wR2 = 0.1525                                                                                 |

Extinction coefficient

n/a

Largest diff. peak and hole

0.327 and  $-0.364 \text{ e. \AA}^{-3}$

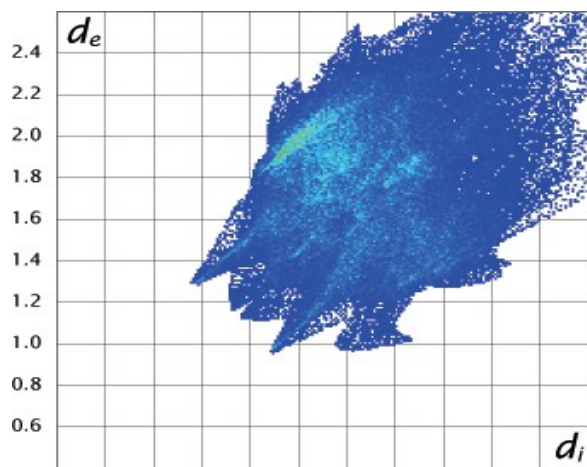

(A) 0.6 0.8 1.0 1.2 1.4 1.6 1.8 2.0 2.2 2.4

All intermolecular interaction

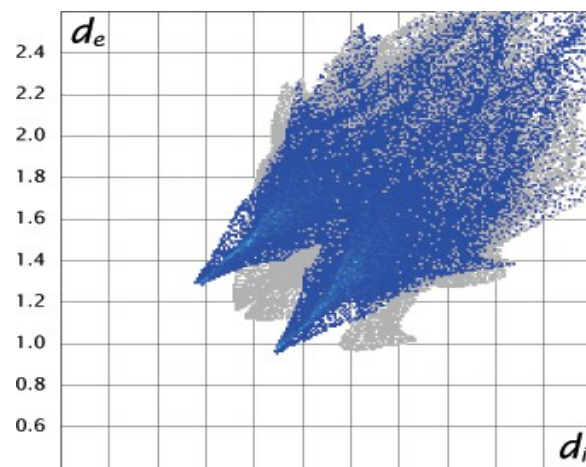

(A) 0.6 0.8 1.0 1.2 1.4 1.6 1.8 2.0 2.2 2.4

O...H interactions

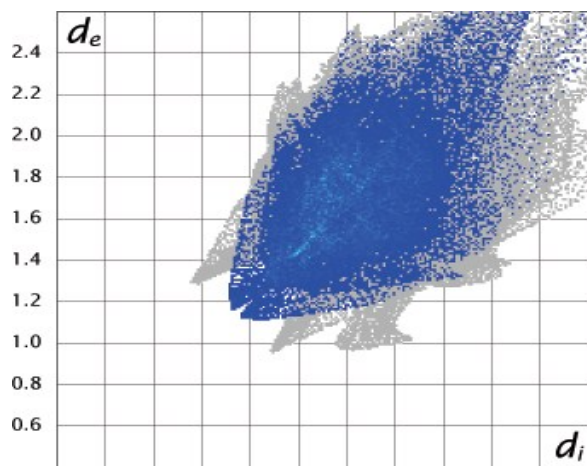

(A) 0.6 0.8 1.0 1.2 1.4 1.6 1.8 2.0 2.2 2.4

H...H interactions

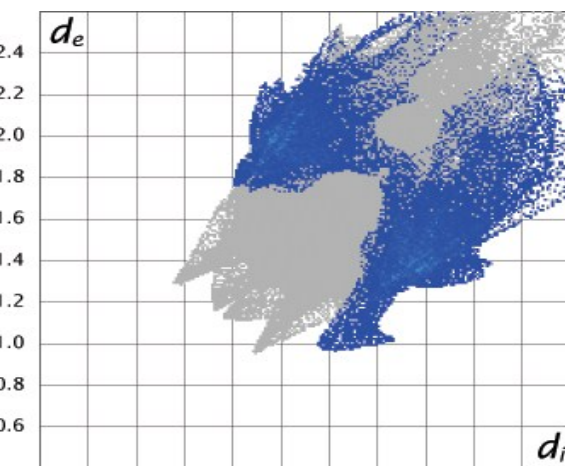

(A) 0.6 0.8 1.0 1.2 1.4 1.6 1.8 2.0 2.2 2.4

C...H interactions

- H-H interaction - 33%
- C-H interaction - 20.5%
- O-H interaction - 26.3%

**Fig. S6** Hirshfeld surface 2D-fingerprint plots for the various intermolecular interaction in KC.



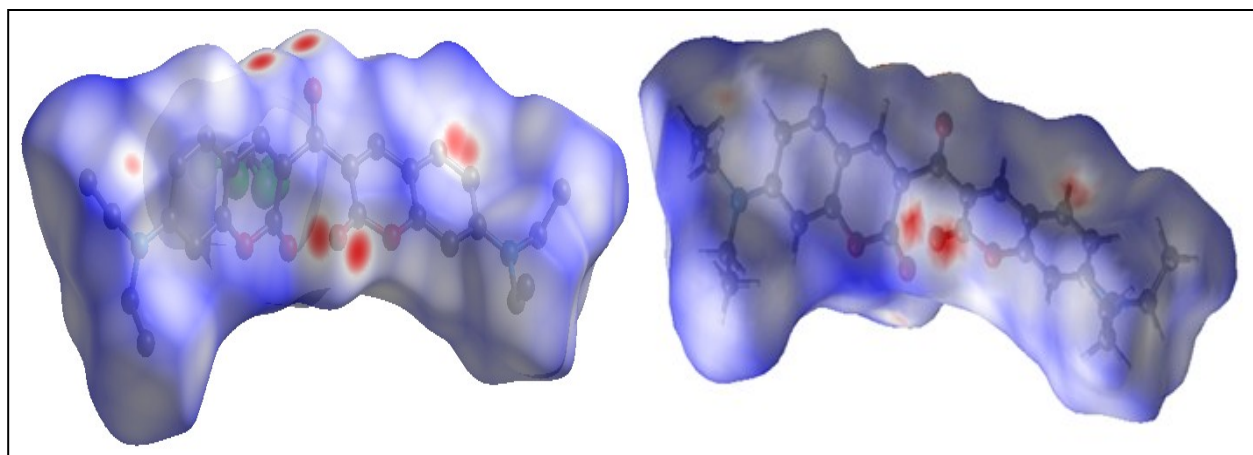

**Fig. S7** Two views of the Hirshfeld surface mapped over  $d_{\text{norm}}$ .

**Table S5** Total energies (hartree), (relative energies in kcal/mol) in the DFT optimized structures I,II, III of KC.

|     | B3LYP/6-31+G**       | M052X/6-31+G**      | BP86/def2-TZVP      |
|-----|----------------------|---------------------|---------------------|
| I   | -1531.4739504 (0.00) | -1531.293211 (0.00) | -1531.978670 (0.00) |
| II  | -1531.4727957 (0.72) | -1531.292058 (0.72) | -1531.977639 (0.65) |
| III | -1531.4661384 (4.90) | -1531.284300 (5.59) | -1531.972253 (4.03) |

**Table S6** Bond lengths (in Å) of bridge carbonyl C10=O5 and the adjacent C8-C10 bonds predicted by the DFT methods and the XRD study.

|     | B3LYP/6-31+G** |        | M052X/6-31+G** |        | BP86/def2-TZVP |        | Expt. (XRD) |        |
|-----|----------------|--------|----------------|--------|----------------|--------|-------------|--------|
|     | C10=O5         | C8-C10 | C10=O5         | C8-C10 | C10=O5         | C8-C10 | C10=O5      | C8-C10 |
| I   | 1.233          | 1.490  | 1.223          | 1.486  | 1.236          | 1.490  | -           | -      |
| II  | 1.232          | 1.491  | 1.223          | 1.486  | 1.236          | 1.491  | 1.220       | 1.481  |
| III | 1.227          | 1.506  | 1.217          | 1.503  | 1.230          | 1.489  | -           | -      |
